# Supplementary material
Source: PubMed Central journal article supplement (PMC7245569)
Supplement: NIHMS1578690-supplement-2.pdf [file NIHMS1578690-supplement-2.pdf]

# Supplementary Fig. 1

**A**

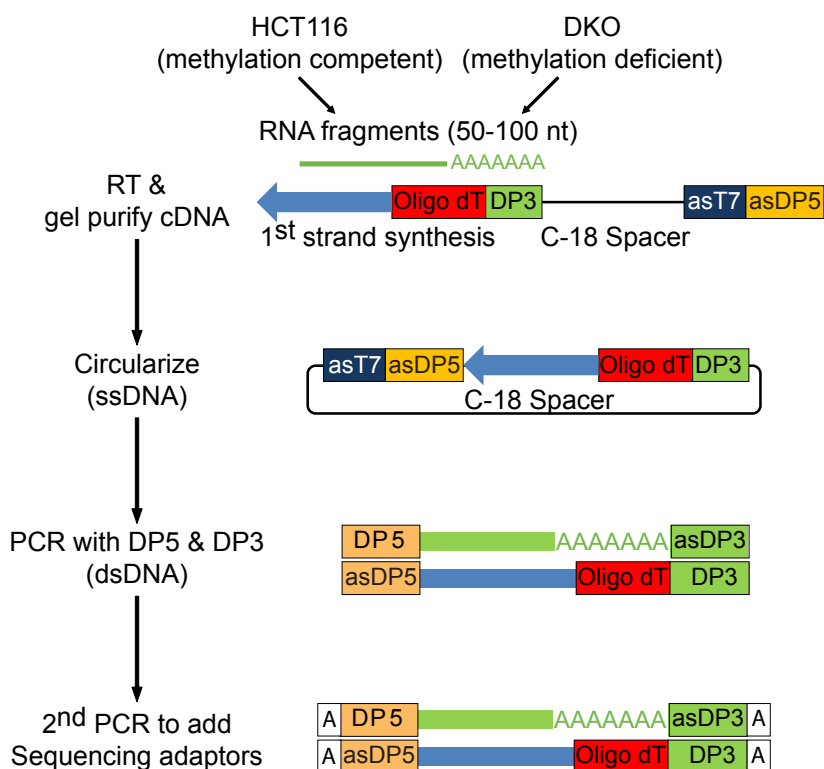

**B**

|           | HCT116 #1 | HCT116 #2 | HCT116 #3 | HCT116 #4 | DKO #1 | DKO #2 | DKO #3 | DKO #4 |
|-----------|-----------|-----------|-----------|-----------|--------|--------|--------|--------|
| HCT116 #1 | 1         |           |           |           |        |        |        |        |
| HCT116 #2 | 1         | 1         |           |           |        |        |        |        |
| HCT116 #3 | 0.97      | 0.97      | 1         |           |        |        |        |        |
| HCT116 #4 | 0.97      | 0.97      | 1         | 1         |        |        |        |        |
| DKO #1    | 0.94      | 0.93      | 0.9       | 0.9       | 1      |        |        |        |
| DKO #2    | 0.93      | 0.93      | 0.91      | 0.91      | 0.98   | 1      |        |        |
| DKO #3    | 0.9       | 0.9       | 0.93      | 0.93      | 0.93   | 0.97   | 1      |        |
| DKO #4    | 0.9       | 0.91      | 0.94      | 0.94      | 0.94   | 0.96   | 0.99   | 1      |

**C**

|                                  | HCT116   |        | DKO      |        | Union    |        |
|----------------------------------|----------|--------|----------|--------|----------|--------|
|                                  | pA sites | Genes  | pA sites | Genes  | pA sites | Genes  |
| All pA sites                     | 26,124   | 12,562 | 25,905   | 13,359 | 30,670   | 14,099 |
| Unambig. Genes                   |          |        |          |        | 29,573   | 11,219 |
| Genes with more than 1 pA site   |          |        |          |        | 25,194   | 6,840  |
| p.adj < 0.0001                   |          |        |          |        | 2,015    | 1,173  |
| Sites used > 5% in ≥ 1 cell line |          |        |          |        | 1,819    | 1,106  |
| Site changes > 1.5 fold          |          |        |          |        | 1,163    | 902    |
| > 10% shift in pA site usage     |          |        |          |        | 718      | 546    |

**D**

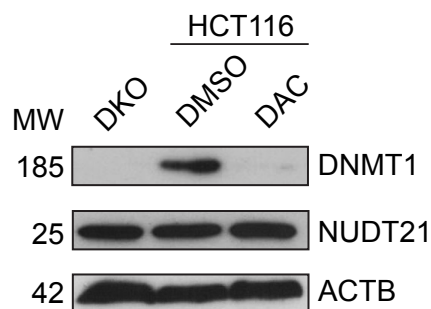

**Figure S1: Protocol and data QC of poly(A)-seq (Related to Figure 1).** **a**, Schematic of the poly(A) sequencing strategy. DP3 and DP5 are Illumina sequencing machine adaptors. **b**, Correlations of poly(A) site usage ratios between poly(A)-seq replicates. **c**, Reanalysis of poly(A)-seq using only the two high depths replicates from HCT116 (Table S1) to confirm sequencing depths did not impact the accuracy of detection and quantification of APA candidates. **d**, Western blot analysis of NUDT21 and DNMT1 proteins in HCT116 cells treated with DMSO for 72 hours, DAC for 72 hours, and untreated DKO cells. ACTB is a loading control. MW, molecular weights (kD).

# Supplementary Fig. 2

**A**

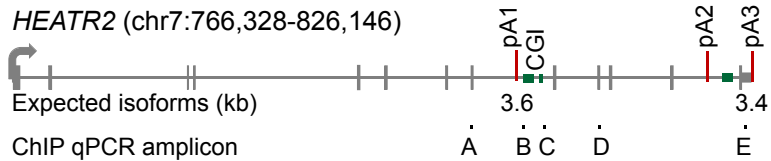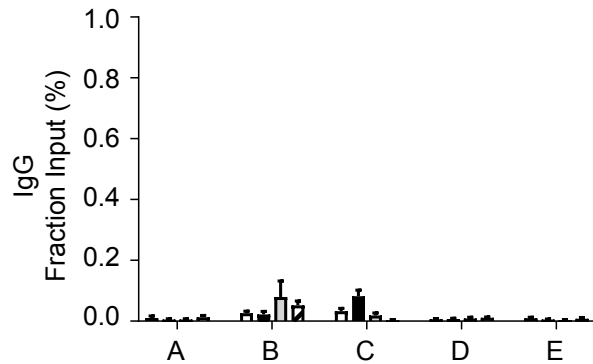

**B**

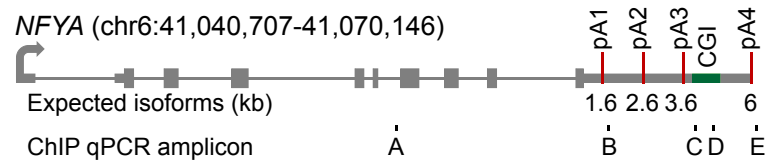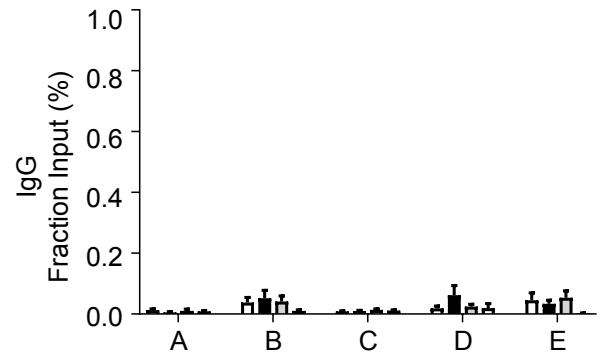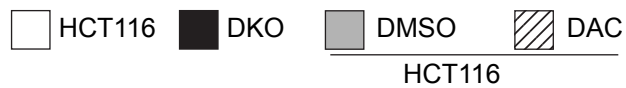

**C**

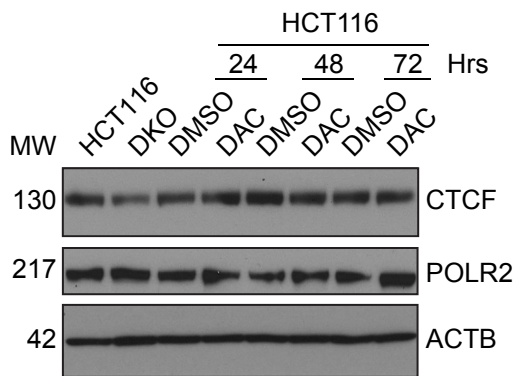

**Figure S2: Removal of DNA methylation does not affect CTCF and POLR2 expression (Related to Figure 2).** **a, b**, ChIP-qPCR for IgG control in HCT116, DKO, DMSO and DAC treated HCT116 cells in *HEATR2* (**a**) and *NFYA* (**b**). **c**, Western blot analysis for CTCF and POLR2 in HCT116, DKO, DMSO and DAC treated HCT116 cells at 24, 48, and 72 hrs of treatment. ACTB is a loading control. MW, molecular weights (kD).

# Supplementary Fig. 3

**A**

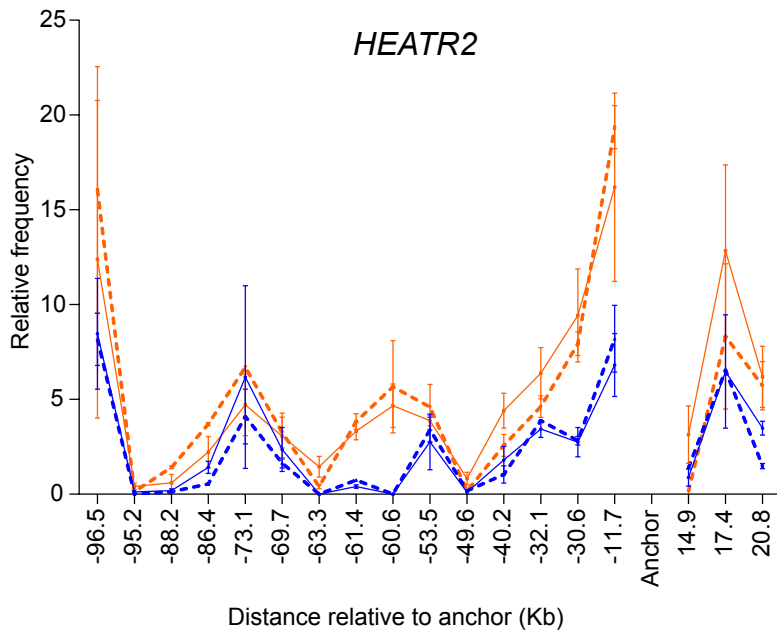

**B**

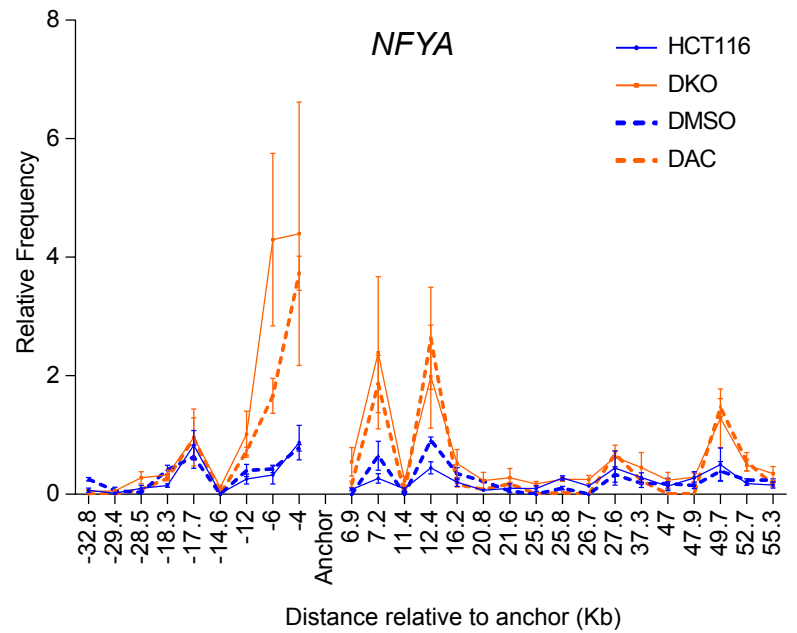

| HCT116 vs DKO |          |          |         | HCT116 (DMSO vs DAC) |          |          |         |
|---------------|----------|----------|---------|----------------------|----------|----------|---------|
| Kb            | HCT116   | DKO      | p-value | Kb                   | DMSO     | DAC      | P-value |
| -96.5         | 8.46E+00 | 1.24E+01 | 0.6806  | -96.5                | 8.17E+00 | 1.61E+01 | 0.3016  |
| -95.2         | 1.18E-01 | 4.13E-01 | 0.1788  | -95.2                | 1.03E-02 | 1.41E-01 | <0.0001 |
| -88.2         | 1.86E-01 | 5.93E-01 | 0.4218  | -88.2                | 1.28E-01 | 1.42E+00 | <0.0001 |
| -86.4         | 1.42E+00 | 2.22E+00 | 0.4173  | -86.4                | 5.37E-01 | 3.70E+00 | <0.0001 |
| -73.1         | 6.17E+00 | 4.72E+00 | 0.7888  | -73.1                | 4.10E+00 | 6.70E+00 | 0.1464  |
| -69.7         | 2.35E+00 | 3.06E+00 | 0.695   | -69.7                | 1.65E+00 | 3.26E+00 | 0.1321  |
| -63.3         | 1.38E-06 | 1.45E+00 | 0.0584  | -63.3                | 5.38E-04 | 3.98E-01 | 0.0311  |
| -61.4         | 4.86E-01 | 3.32E+00 | 0.0039  | -61.4                | 7.39E-01 | 3.84E+00 | 0.0017  |
| -60.6         | 8.24E-03 | 4.67E+00 | 0.0157  | -60.6                | 7.95E-04 | 5.67E+00 | 0.0404  |
| -53.5         | 2.75E+00 | 3.88E+00 | 0.4915  | -53.5                | 3.41E+00 | 4.60E+00 | 0.4329  |
| -49.6         | 1.08E-01 | 8.21E-01 | 0.0988  | -49.6                | 1.78E-01 | 1.65E-01 | 0.7946  |
| -40.2         | 1.80E+00 | 4.40E+00 | 0.0902  | -40.2                | 1.04E+00 | 2.58E+00 | 0.1056  |
| -32.1         | 3.43E+00 | 6.38E+00 | 0.1072  | -32.1                | 3.88E+00 | 4.62E+00 | 0.2652  |
| -30.6         | 2.75E+00 | 9.43E+00 | 0.0303  | -30.6                | 2.82E+00 | 7.94E+00 | 0.0016  |
| -11.7         | 6.81E+00 | 2.04E+01 | 0.0125  | -11.7                | 8.20E+00 | 1.94E+01 | 0.006   |
| 14.9          | 8.83E-01 | 3.14E+00 | 0.2275  | 14.9                 | 1.40E+00 | 1.38E-01 | <0.0001 |
| 17.4          | 6.47E+00 | 1.28E+01 | 0.3068  | 17.4                 | 6.54E+00 | 8.32E+00 | 0.665   |
| 20.8          | 3.49E+00 | 6.19E+00 | 0.1785  | 20.8                 | 1.49E+00 | 5.72E+00 | 0.0304  |

| HCT116 vs DKO |          |          |         | HCT116 (DMSO vs DAC) |          |          |         |
|---------------|----------|----------|---------|----------------------|----------|----------|---------|
| Kb            | HCT116   | DKO      | p-value | Kb                   | DMSO     | DAC      | P-value |
| -32.8         | 6.77E-02 | 4.41E-02 | 0.6097  | -32.8                | 2.53E-01 | 3.75E-05 | 0.0011  |
| -29.4         | 1.66E-02 | 5.70E-02 | 0.0699  | -29.4                | 6.15E-02 | 2.20E-05 | 0.3737  |
| -28.5         | 9.84E-02 | 2.79E-01 | 0.1937  | -28.5                | 2.96E-02 | 8.57E-02 | 0.0781  |
| -18.3         | 1.47E-01 | 3.25E-01 | 0.1057  | -18.3                | 4.12E-01 | 2.68E-01 | 0.181   |
| -17.7         | 8.29E-01 | 9.59E-01 | 0.8218  | -17.7                | 6.31E-01 | 9.44E-01 | 0.4743  |
| -14.6         | 1.33E-02 | 1.15E-01 | 0.0595  | -14.6                | 1.28E-03 | 6.77E-03 | 0.0254  |
| -12           | 2.55E-01 | 1.01E+00 | 0.1316  | -12                  | 4.02E-01 | 7.27E-01 | 0.0561  |
| -6            | 3.25E-01 | 4.29E+00 | 0.0276  | -6                   | 4.26E-01 | 1.66E+00 | 0.015   |
| -4            | 8.70E-01 | 4.39E+00 | 0.0382  | -4                   | 7.85E-01 | 3.73E+00 | 0.0006  |
| 6.9           | 8.31E-02 | 5.47E-01 | 0.1261  | 6.9                  | 1.24E-04 | 1.68E-01 | 0.0316  |
| 7.2           | 2.68E-01 | 2.39E+00 | 0.0456  | 7.2                  | 6.50E-01 | 1.86E+00 | 0.0895  |
| 11.4          | 9.23E-02 | 2.25E-01 | 0.1788  | 11.4                 | 1.04E-03 | N/A      |         |
| 12.4          | 4.46E-01 | 1.98E+00 | 0.0077  | 12.4                 | 9.09E-01 | 2.63E+00 | 0.1173  |
| 16.2          | 2.01E-01 | 5.19E-01 | 0.2684  | 16.2                 | 3.49E-01 | 1.65E-01 | 0.1805  |
| 20.8          | 6.86E-02 | 2.31E-01 | 0.3048  | 20.8                 | 2.20E-01 | 8.04E-02 | 0.0066  |
| 21.6          | 9.95E-02 | 2.80E-01 | 0.36    | 21.6                 | 5.22E-02 | 1.78E-01 | 0.0109  |
| 25.5          | 9.76E-02 | 1.74E-01 | 0.3159  | 25.5                 | 1.44E-03 | 4.51E-03 | 0.0792  |
| 25.8          | 2.76E-01 | 2.51E-01 | 0.6721  | 25.8                 | 1.03E-01 | 2.64E-02 | 0.0608  |
| 26.7          | 1.42E-01 | 2.50E-01 | 0.2184  | 26.7                 | 3.11E-03 | 1.97E-04 | 0.1259  |
| 27.6          | 4.43E-01 | 6.27E-01 | 0.6292  | 27.6                 | 3.32E-01 | 6.82E-01 | 0.0715  |
| 37.3          | 2.82E-01 | 4.51E-01 | 0.5631  | 37.3                 | 1.84E-01 | 2.32E-01 | 0.5825  |
| 47            | 1.38E-01 | 2.37E-01 | 0.5526  | 47                   | 1.80E-01 | 5.37E-03 | 0.1253  |
| 47.9          | 2.73E-01 | 2.84E-01 | 0.9349  | 47.9                 | 1.47E-01 | 1.30E-02 | 0.0622  |
| 49.7          | 5.00E-01 | 1.28E+00 | 0.2429  | 49.7                 | 3.91E-01 | 1.46E+00 | 0.0083  |
| 52.7          | 1.79E-01 | 4.93E-01 | 0.0436  | 52.7                 | 2.36E-01 | 5.50E-01 | 0.1129  |
| 55.3          | 1.53E-01 | 3.49E-01 | 0.2113  | 55.3                 | 2.37E-01 | 1.57E-01 | 0.2374  |

**Figure S3: 3C-qPCR analysis reveals interactions between APA control regions and distal genomic locations (Related to Figure 3).** a, b, Top, 3C-qPCR analysis of HEATR2 (a) and NFYA (b) with respect to the anchor fragments containing the APA control regions in each gene. HCT116 (solid blue), DKO (solid orange), and HCT116 after 72 hours of treatment with DMSO (DMSO, dotted blue) or DAC (DAC, dotted orange) are plotted. Distance (kb) from the anchor fragment is noted on the x-axis. Bottom, mean relative interaction frequencies are summarized in the tables. Distance (Kb) relative to anchor is provided, and p-values are indicated for each tested interaction.

# Supplementary Fig. 4

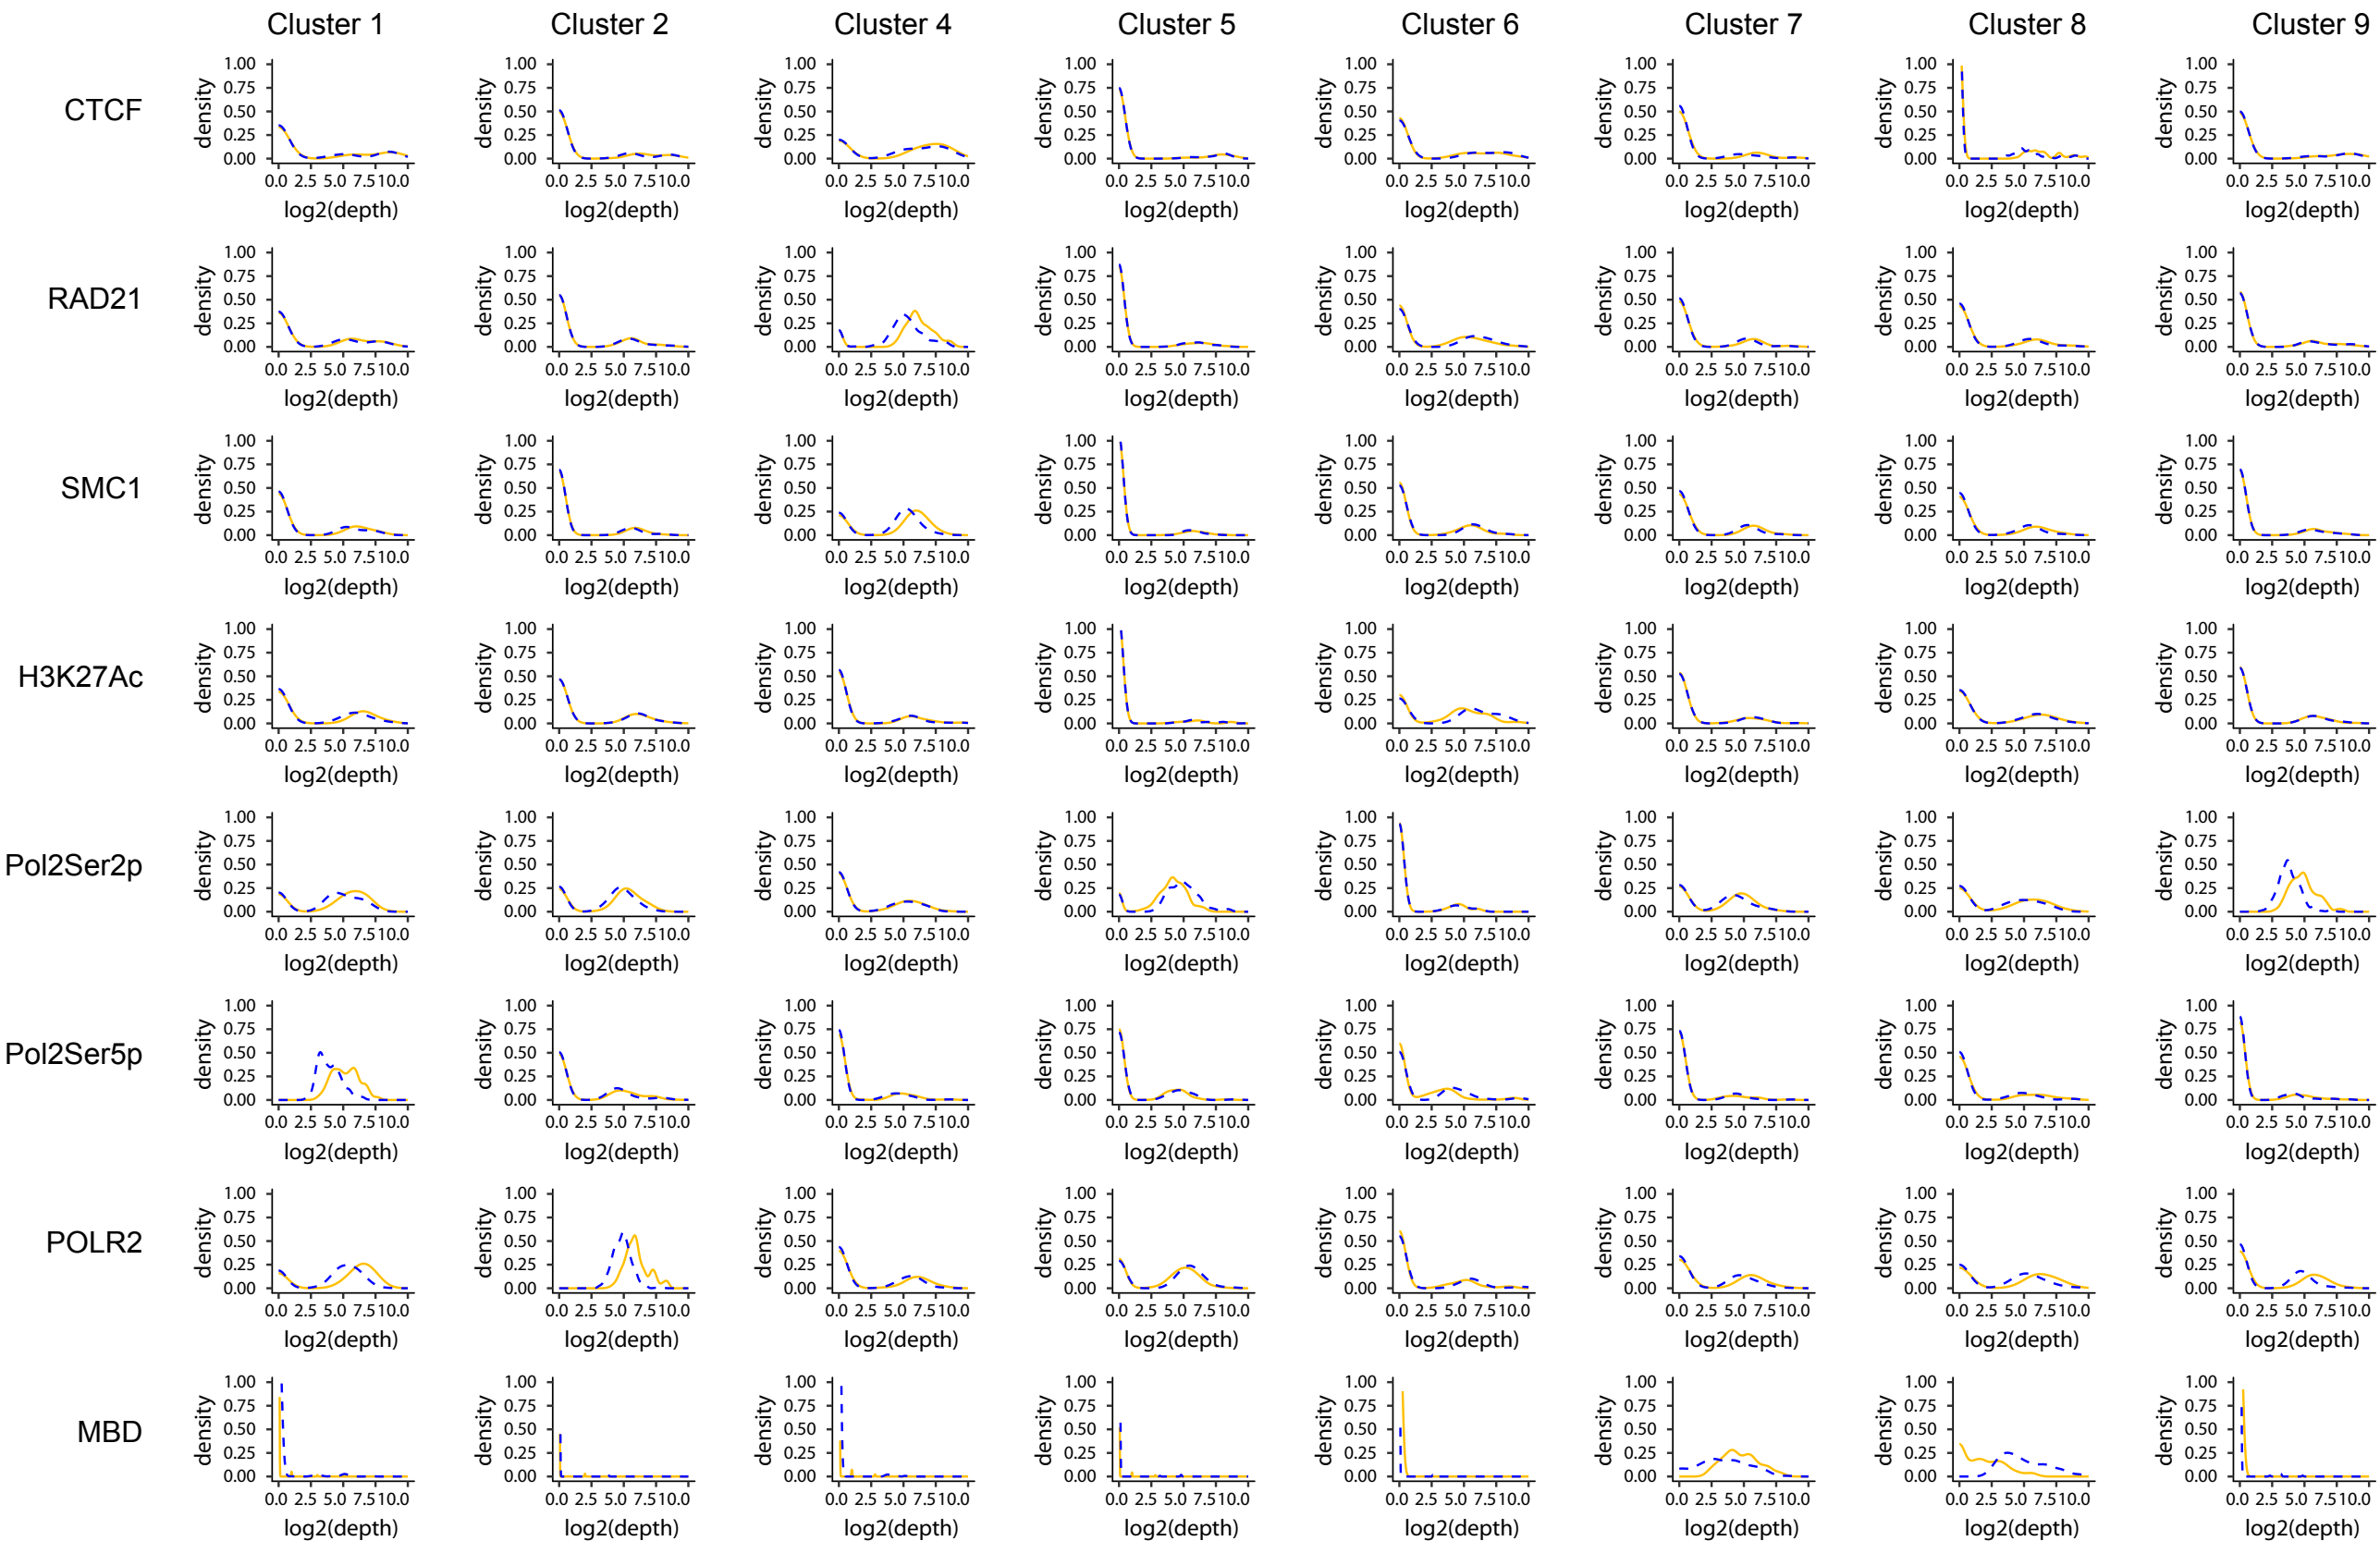



**Figure S4: ChIP-seq cluster characteristics (Related to Figure 5).** ChIP-seq signal characteristics for HCT116 and DKO in all other integrative consensus clusters. Blue dotted lines, HCT116 signals; yellow solid lines, DKO signals.

# Supplementary Fig. 5

**A**

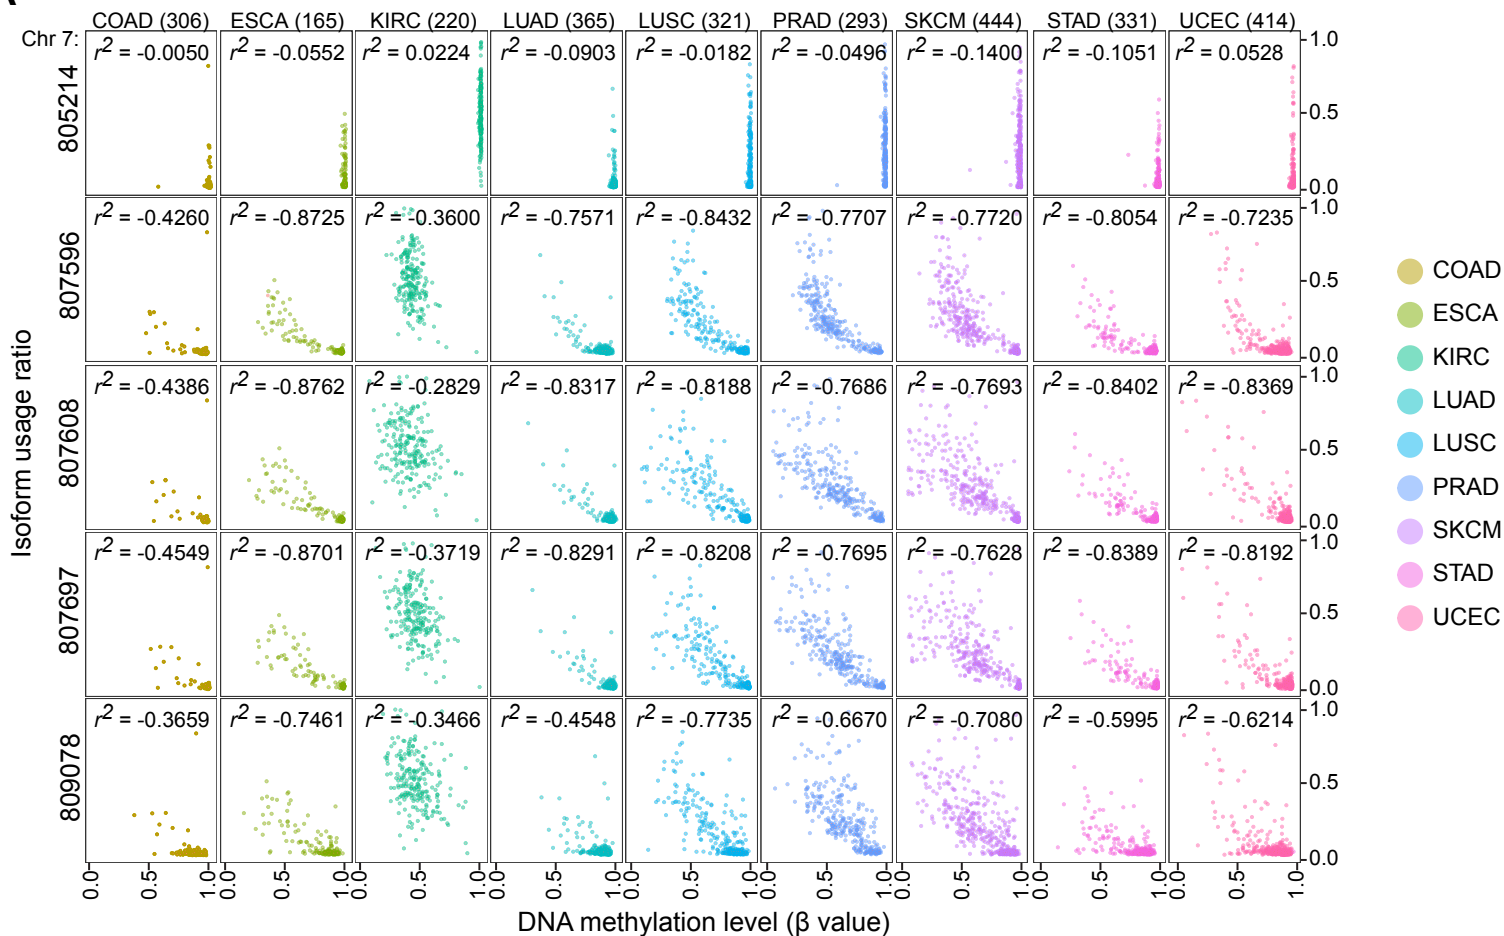

**B**

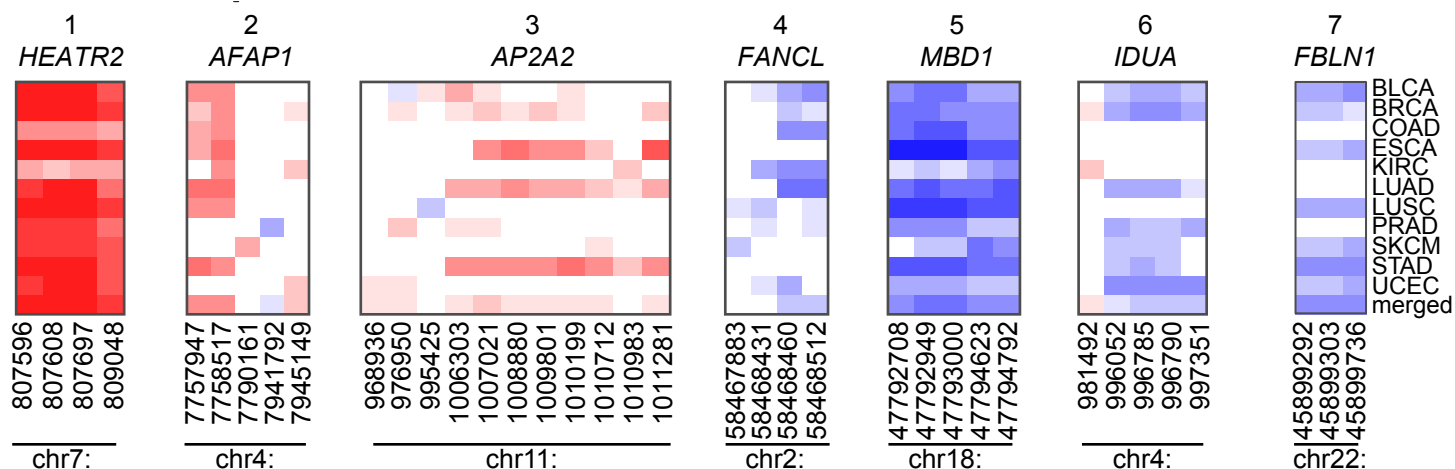

**Figure S5: Additional TCGA correlation results (Related to Figure 5).** **a**, Correlation between calculated isoform usage ratio and DNA methylation level at 5 CpG sites in HEATR2. COAD, colon adenocarcinoma; ESCA, esophageal carcinoma; KIRC, kidney renal clear cell carcinoma; LUAD, lung adenocarcinoma; LUSC, lung squamous cell carcinoma; PRAD, prostate adenocarcinoma; SKCM, skin cutaneous melanoma; STAD, stomach adenocarcinoma; UCEC, uterine corpus endometrial carcinoma;  $r^2$ , Pearson correlation coefficient. The number of samples in each cohort is indicated in the parentheses. **b**, Enlarged view of the 7 best correlations from **Figure 5D**. CpG probe positions are noted below each heat map.

**Supplementary Table 7. PCR primers used in the study (Related to STAR Methods)**

| Primer name                                                               | Primer sequence            |
|---------------------------------------------------------------------------|----------------------------|
| <b>Bisulfite sequencing</b>                                               |                            |
| HEATR2 BSF                                                                | TATTTATGGAGATTTATAGGGAGG   |
| HEATR2 BSR                                                                | AAAATCAAACAATAATTAACAAC    |
| NFYA BSF                                                                  | GGTAGGTTTTAATAGAGTTTGTTAGG |
| NFYA BSR                                                                  | AAACCTCCAAAACTTAAACCC      |
| <b>ChIP</b>                                                               |                            |
| NFYA-A F                                                                  | CACTACCAGTGGCAGGCAAT       |
| NFYA-A R                                                                  | AGGCATCAAGTTGCATGTTC       |
| NFYA-B F                                                                  | GATGCCTGGCAAATTGAAGT       |
| NFYA-B R                                                                  | TGTGTCTCCTTGCATCATCC       |
| NFYA-C F                                                                  | GCCAGTGGAACCTGTCCTTA       |
| NFYA-C R                                                                  | TCCTACGATAAAGCCGTTGG       |
| NFYA-D F                                                                  | GCCCTGTTCCGGTACCTA         |
| NFYA-D R                                                                  | GGCTTCCGAAAGACCAGTAG       |
| NFYA-E F                                                                  | CCTGTGAGGAAGGAATAGGTGT     |
| NFYA-E R                                                                  | CAGTCCATGTACAGGGTAGG       |
| HEATR2-A F                                                                | AGCCCTGAGTGTTGGAATTG       |
| HEATR2-A R                                                                | ATGTGCTTGCGGTAGAGGTC       |
| HEATR2-B F                                                                | ATGGTCCGGTGGAAGTGTC        |
| HEATR2-B R                                                                | ACGTGTCTACCTTCCAAGCA       |
| HEATR2-C F                                                                | GTCCTTGCCCTGTCATTCAT       |
| HEATR2-C R                                                                | ACTCAGGGCCAAGCTCCT         |
| HEATR2-D F                                                                | GTTTCTTCCGAGCACCTGTC       |
| HEATR2-D R                                                                | CCAGGATGTCCTTTGTCACC       |
| HEATR2-E F                                                                | CTCTGTGCCAGCAGTGAGAC       |
| HEATR2-E R                                                                | AGCCCTCTCGATGAACAGAA       |
| <b>Northern probe (for cloning constructs for in vitro transcription)</b> |                            |
| 289                                                                       | TGTGATGGAGCTGATCAAGG       |
| 527                                                                       | TCATCCGAATCCATGAAATG       |
| 505                                                                       | GGAGACGATGGACTCACTGG       |
| 526                                                                       | GTGCGACGATGACACTGAAC       |
| 316                                                                       | TCCTACGAGCACCAAGACAA       |
| 549                                                                       | CTAACCTCGCCCTTCTCCTT       |
| <b>qRT-PCR</b>                                                            |                            |
| HEATR2 qRT proximal F                                                     | TGCATTTACTGCAGCTCTGG       |
| HEATR2 qRT proximal R                                                     | GGCCCAAAGAGATGTGTGTT       |
| HEATR2 qRT distal F                                                       | CTCTGTGCCAGCAGTGAGAC       |
| HEATR qRT distal R                                                        | AGCCCTCTCGATGAACAGAA       |
| NFYA qRT total F                                                          | GATGCCTGGCAAATTGAAGT       |
| NFYA qRT total R                                                          | TGTGTCTCCTTGCATCATCC       |
| NFYA qRT distal F                                                         | GCCAGTGGAACCTGTCCTTA       |
| NFYA qRT distal R                                                         | TCCTACGATAAAGCCGTTGG       |

| <b>Methylation specific PCR</b> |                             |
|---------------------------------|-----------------------------|
| NFYA_Methylated_MSP_F           | ATTTATTGTTTTTTCGGAAGTTTC    |
| NFYA_Methylated_MSP_R           | TAAATACAAATACCGACCGTGC      |
| NFYA_Unmethylated_MSP_F         | ATTTATTGTTTTTGGGAAGTTTTG    |
| NFYA_Unmethylated_MSP_R         | TTAAATACAAATACCAACCATCACC   |
| <b>CRISPR guide RNA</b>         |                             |
| NFYA_Guide_A                    | CGGCGTCGCATGCCGCTCGCCGG     |
| NFYA_Guide_B                    | GGCGCTGCTTCCCGACCTACTGG     |
| <b>3C primers</b>               |                             |
| <b>NFYA_3C_Primer</b>           |                             |
| -32.8                           | GCGTTTGAGCCTTGATTCTT        |
| -29.4                           | GCTTGAGTTGAATGAATCAGGA      |
| -28.5                           | CAAGCCTGATCTGGATGACA        |
| -18.3                           | CCCAAGCATAAAGCATCAGAA       |
| -17.7                           | CAATGCTCTCATGTCCCAA         |
| -14.6                           | AAAGATTTCTTAAAAGCACTTTCTGG  |
| -12                             | TTGGCAAAAATATGCCAGTG        |
| -6                              | CCATCATGGGCAATACTACTTTC     |
| -4                              | GGTTTCACTCTGACACCCTTG       |
| Anchor                          | AGCTTTTTCTTGGCTAGAGTCC      |
| 6.9                             | TTGTCCATTTGCTCACTCCA        |
| 7.2                             | GGATCCTTTGAGGCACAGAC        |
| 11.4                            | TTAGGCAGAATTCCTGATGAAA      |
| 12.4                            | ACCAGAAAAACATTCTTTATGCTTTCA |
| 16.2                            | TCCTGAAGAAATATGCATGGAA      |
| 20.8                            | TGATTGTTGCAGGCTTTTTG        |
| 21.6                            | CACAGGTGAAAAGCTATGACTCAG    |
| 25.5                            | TTGCACCTAGAAGCCAATAAAGA     |
| 25.8                            | TGTTCAAATATAGGGCCCAAACA     |
| 26.7                            | AAGGCAGCTGCAATTTTTCTG       |
| 27.6                            | CTTCAAAGGAGAATCTTCACTGACAT  |
| 37.3                            | TGGTTTCTGAGTGAGGTCCAAA      |
| 47                              | AGGCCAGATGGCTTCACT          |
| 47.9                            | AAAACACTCCACCCAACAGC        |
| 49.7                            | TGCCATTCAAATTTTAGAGTAAGAAA  |
| 52.7                            | GGTCCAATCCCCCTACAAAT        |
| 55.3                            | AGCTTCCAGTGTTTTATTCCTGT     |
| <b>HEATR2_3C_Primer</b>         |                             |
| -96.5                           | CATTCTTGAGCCCTGGTCAC        |
| -95.2                           | TGATTTCCATTTGCAGAAAGC       |
| -88.2                           | CTGGCTCAAATATTCACACA        |
| -86.4                           | GGGCATGGCTGGAGTATCTA        |
| -73.1                           | TCTGTGGCCTGATGTCTTTAAT      |
| -69.7                           | AGGATTTGCAGCGGACTG          |

|        |                       |
|--------|-----------------------|
| -63.3  | CGCCTCTCAGAAAACCCTTT  |
| -61.4  | CTTCCTGCTTTGGGACTCAG  |
| -60.6  | TGTTTTGCTTGCAGCTCAGT  |
| -53.5  | CTTTGAAGTTGCATGCGTGT  |
| -49.6  | ACCGTCCCTTGTTTGGTCTC  |
| -40.2  | AGCAACACCATCAACCAACA  |
| -32.1  | TGGGTAGGGAAGTGGTTGAG  |
| -30.6  | ATGGATGGGAGCACTAAGGA  |
| -11.7  | TTTCCACATGGTGTGTACCTT |
| Anchor | TCACAGTGGATGAGGCTGG   |
| 14.9   | ACTTGGTGCCCAACAAATTC  |
| 17.4   | CCAAATGCGCTCAGATGC    |
| 20.8   | GCTGGGAGAACAGTCTGGAG  |
